# Supplementary material
Source: PubMed Central journal article supplement (PMC2447646)
Supplement: M709454200_1.pdf [file M709454200_1.pdf]

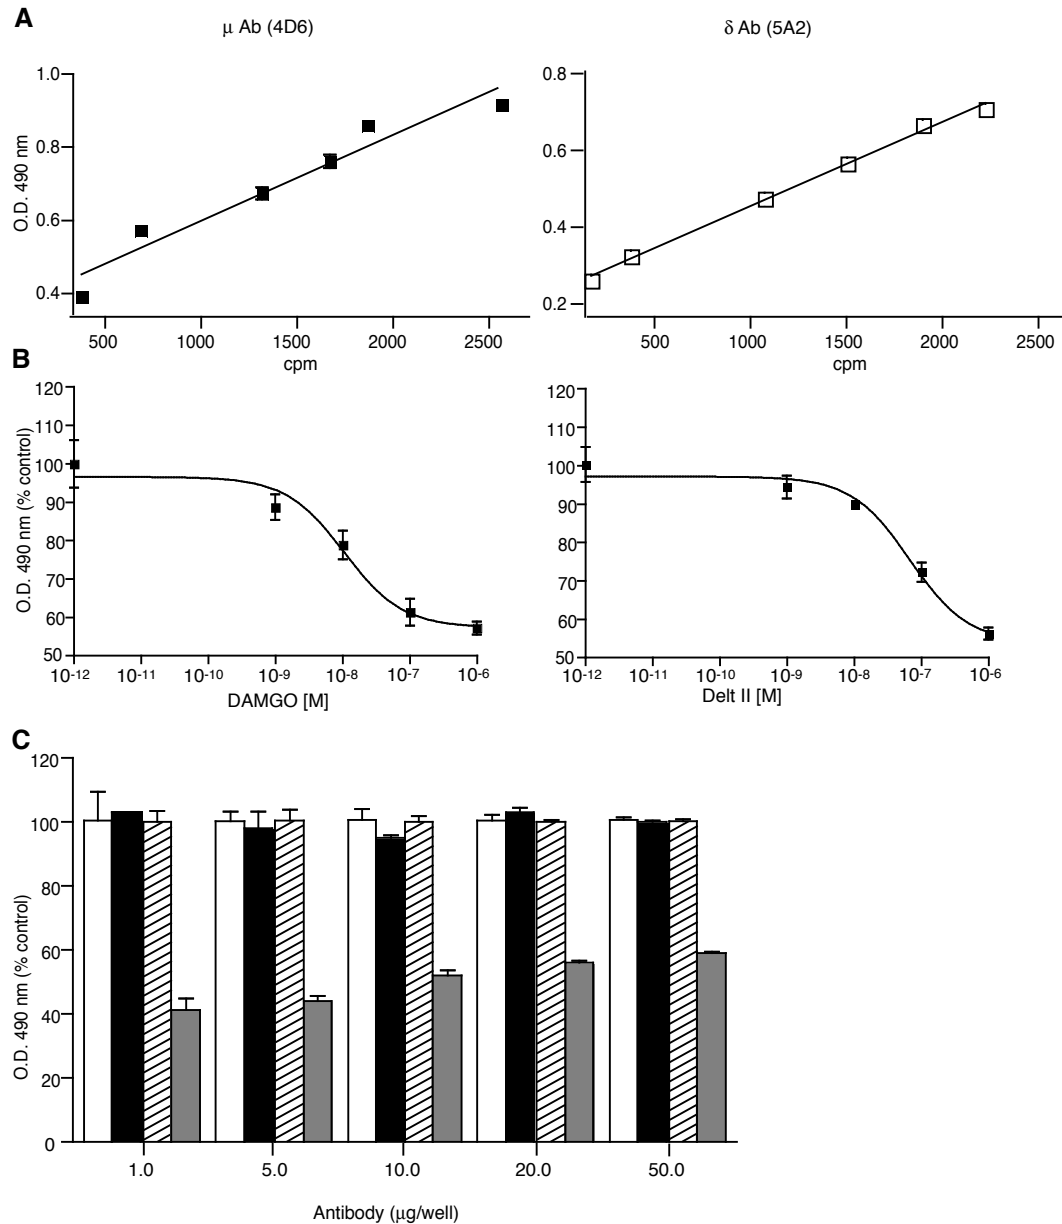

**Supplemental Fig. 1. Linear relationship between antibody binding and receptor number (A)** CHO cells expressing  $\mu$ OR or  $\delta$ OR ( $0.5\text{--}6 \times 10^5$  cells) were subjected to ELISA using  $\mu$ OR (4D6) or  $\delta$ OR (5A2) mAbs as described in Methods. In a parallel set of plates binding assays were carried out using 10 nM [ $^3$ H]diprenorphine. Non-specific binding was determined in the presence of 1  $\mu$ M DAMGO or Deltorphin II. Results are mean  $\pm$  SEM of 2 experiments in triplicate. **(B) ELISA in unfixed cells.** CHO cells expressing  $\mu$ OR or  $\delta$ OR ( $2 \times 10^5$  cells/tube) were treated with DAMGO or Deltorphin II (0–1  $\mu$ M) and subjected to ELISA using  $\mu$ OR (4D6) or  $\delta$ OR (5A2) mAbs as described in Methods. Results are mean  $\pm$  SEM of 3 experiments in triplicate. **(C) ELISA with different mAb concentrations.** CHO cells expressing Flag tagged  $\mu$ OR ( $2 \times 10^5$  cells/tube) were treated with (■, ▨) or without (□, ▩) 1  $\mu$ M DAMGO and subjected to ELISA using different concentrations (1–50  $\mu$ g/well) of  $\mu$ OR (4D6; ▨, ▩) or Flag (□, ■) mAbs as described in Methods. Results are mean  $\pm$  SEM of 2 experiments in triplicate.

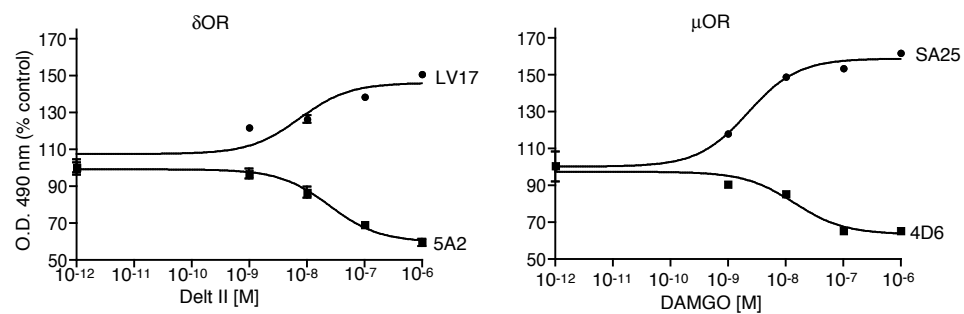

**Supplemental Fig. 2. Comparison of the change in receptor recognition following agonist treatment by monoclonal (mAb) and polyclonal (pAb) antibodies.** CHO cells expressing  $\mu$ OR or  $\delta$ OR ( $2 \times 10^5$  cells/well) were treated with indicated doses of DAMGO or Deltorphin II and subjected to ELISA using  $\mu$ OR mAb (4D6),  $\mu$ OR pAb (SA25),  $\delta$ OR mAb (5A2) or  $\delta$ OR pAb (LV17) as described in Methods. Results are mean  $\pm$  SEM of 3 experiments in triplicate.

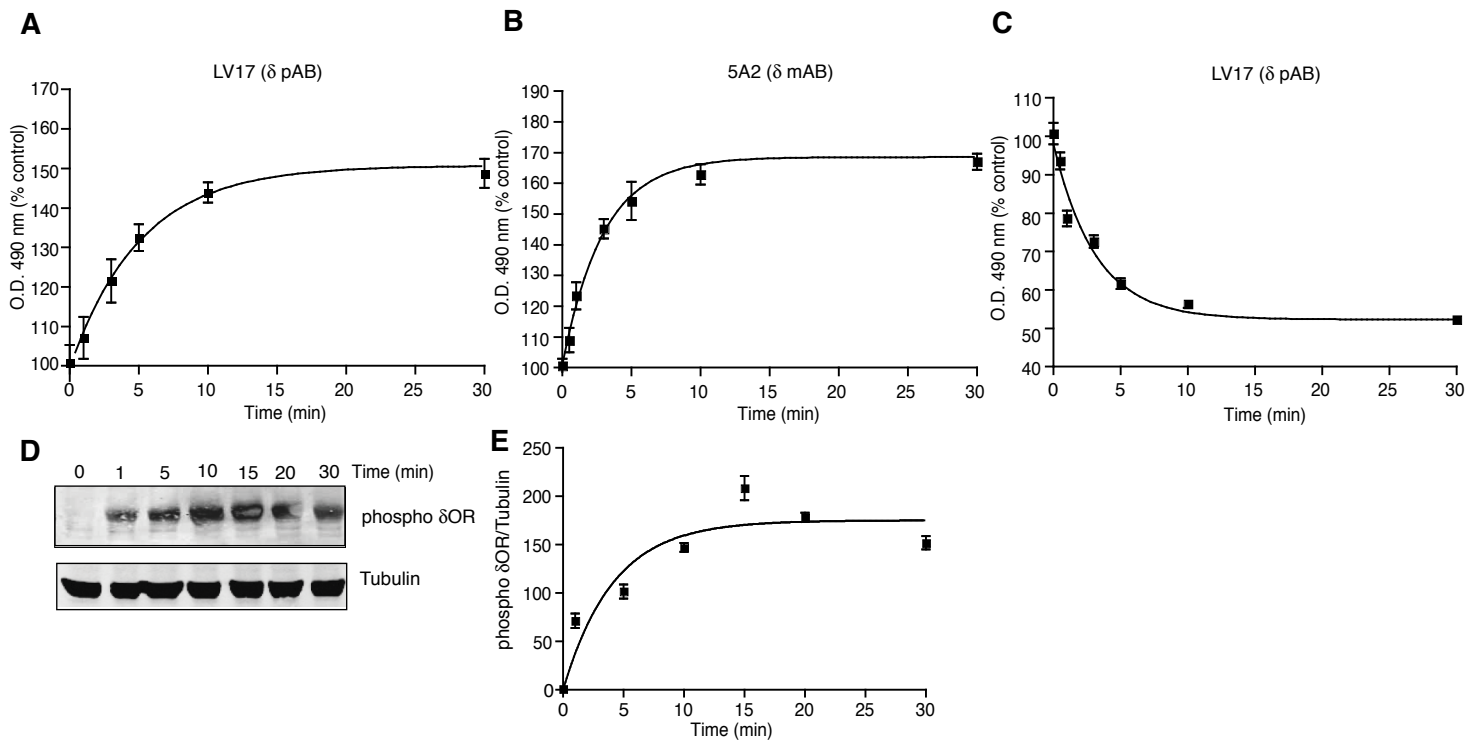

**Supplemental Fig. 3. Time course of change in receptor recognition following agonist treatment.** (A) CHO cells expressing  $\delta$ OR ( $2 \times 10^5$  cells) were treated with or without  $1 \mu\text{M}$  Deltorpin II (0-60 min) and subjected to ELISA using  $\delta$ OR pAb (LV17) as described in Methods. (B & C) CHO cells expressing  $\delta$ OR ( $2 \times 10^5$  cells) were treated with  $1 \mu\text{M}$  Deltorpin II (60 min) followed by treatment with  $1 \mu\text{M}$  TIPP<sub>ψ</sub> ( $\delta$ OR antagonist) for different time periods (0-60 min) and subjected to ELISA using  $\delta$ OR mAb (5A2) or pAb (LV17) as described in Methods. Results are mean  $\pm$  SEM of 3 experiments in triplicate. (D, E) CHO cells expressing  $\delta$ OR ( $2 \times 10^5$  cells) were treated with  $100 \text{ nM}$  Deltorpin II (0-60 min) and subjected to Western blot analysis with rabbit polyclonal anti-phospho  $\delta$ OR and mouse monoclonal anti-tubulin antibodies as described in Methods. A representative blot is shown. The data was densitized and represented as a ratio of phospho  $\delta$ OR to tubulin.

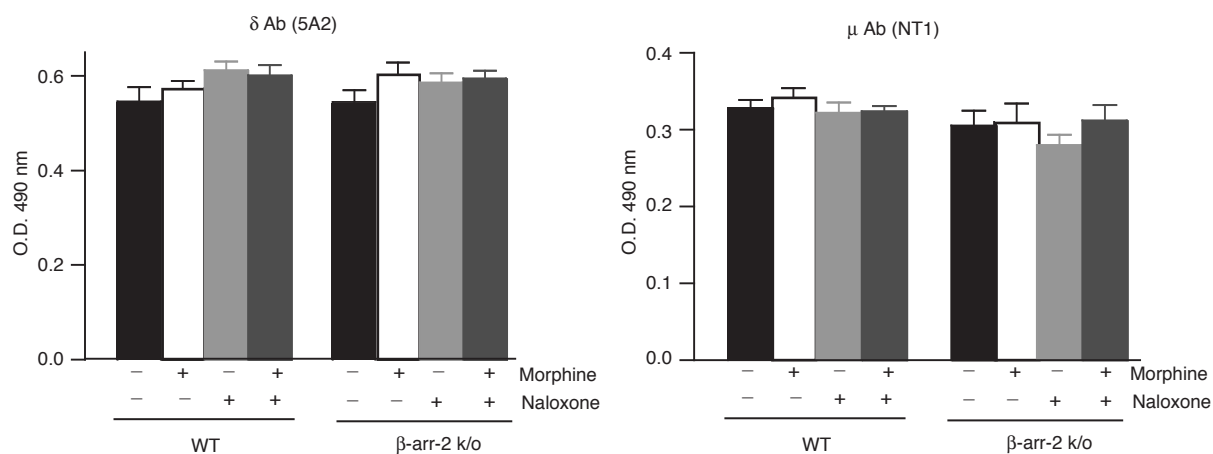

**Supplemental Fig.4. δOR or μOR levels are not changed in β-arrestin 2 knock-out mice.** β-arrestin 2 knock-out mice (β-arr k/o) or their wild-type (WT) littermate controls were injected intraperitoneally with either 10mg/kg morphine, 1mg/kg naloxone, 10mg/kg morphine+1mg/kg naloxone or saline and sacrificed 30 min later. Membranes prepared from the PFC were probed by ELISA with the μOR (NT1) or δOR (5A2) antibodies. Results are mean ± SEM of 3 experiments in triplicate.

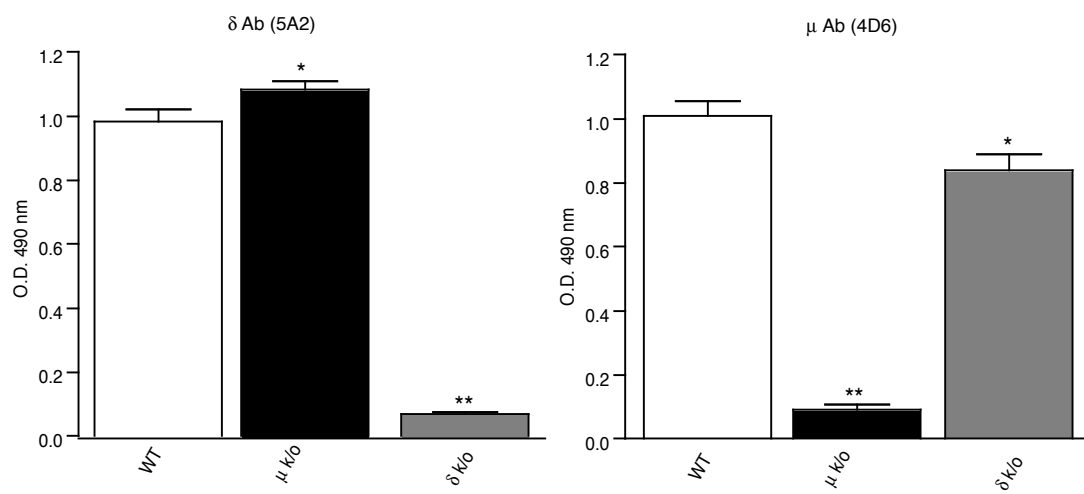

**Supplemental Fig. 5 Receptor selectivity of  $\mu$ OR and  $\delta$ OR mAbs.** Membranes from the brain of wild-type (WT) mice or mice lacking either  $\mu$ OR ( $\mu$  k/o) or  $\delta$ OR ( $\delta$  k/o) were subjected to ELISA using mAbs to  $\mu$ OR (4D6) or  $\delta$ OR (5A2) as described in Methods. Results are Mean  $\pm$  SEM of 3 experiments in triplicate. \*p<0.05; \*\* p<0.001
